# Supplementary material
Source: MDPI journal article supplement (https://www.mdpi.com/2071-1050/13/12/6532)
Supplement: s1 [file s1 › sustainability-1215494-supplementary.pdf]

## Supplementary Materials

### 1. Information about QC/QA in the total amount of HMs

There is no standard sample of MSWI fly ash. The accuracy of the experimental data was determined by adding a standard solution. The fly ash was digested, and a certain amount of standard solution was added into the solution. The samples and the samples added to the standard solution were tested for heavy metals using ICP-OES. The recovery rate of the standard solution added was calculated according to the following formula:

$$\text{Recovery rate} = \frac{(C3-C1)*100\%}{C2}$$

**Table S1.** Recovery rate of the addition of the standard solution (mg/L).

| Element | Concentration of the sample (C1) | Concentration of the standard solution added (C2) | Concentration after adding the standard solution (C3) | Recovery ratio |
|---------|----------------------------------|---------------------------------------------------|-------------------------------------------------------|----------------|
| Pb      | 2.3852                           | 3                                                 | 5.1778                                                | 93.09%         |
| Cu      | 0.9783                           | 1                                                 | 1.96745                                               | 98.92%         |
| Zn      | 11.511                           | 10                                                | 22.2665                                               | 107.56%        |
| Cd      | 0.4623                           | 0.5                                               | 0.94345                                               | 96.23%         |
| Cr      | 0.9578                           | 1                                                 | 1.9367                                                | 97.89%         |
| Ni      | 0.0449                           | 0.1                                               | 0.1357                                                | 90.80%         |
| As      | 0.2198                           | 0.2                                               | 0.4297                                                | 104.95%        |
| Ba      | 2.0109                           | 2                                                 | 4.01635                                               | 100.27%        |

By adding the standard solution at a similar concentration, the recovery rate ranged from 90.80% to 107.56%. According to the standard, when the contents of the components measured was less than 1 mg/L, the allowable limit of recovery was 80%–120%. The allowable limit of recovery was 90%–110% when the contents of the components measured were 1–100 mg/L. When the contents of the components measured were ≥100 mg/L, the allowable limit of recovery was 95%–105%.

Two blank samples were made for each batch, and the blank value of the tested elements was not lower than the detection limit.

Each sample was measured three times, and the relative deviation was calculated according to the following formula, as shown in Table 1:

$$\text{Relative deviation (Rd)} = \frac{\text{Measured value} - \text{average}}{\text{average}} \times 100\%$$

**Table S2.** Test concentration and relative deviation (mg/L).

|    |   | Spring  | Summer  | Autumn  | Winter  | Rd1    | Rd2    | Rd3    | Rd4    |
|----|---|---------|---------|---------|---------|--------|--------|--------|--------|
| Pb | 1 | 2.6503  | 3.2187  | 4.3891  | 2.4890  | −1.76% | −2.10% | 0.89%  | −0.01% |
|    | 2 | 2.6887  | 3.2902  | 4.3309  | 2.4600  | −0.33% | 0.07%  | −0.45% | −1.18% |
|    | 3 | 2.7540  | 3.3546  | 4.3315  | 2.5190  | 2.09%  | 2.03%  | −0.44% | 1.19%  |
| Cu | 1 | 1.0359  | 1.3209  | 1.9870  | 1.3190  | −1.33% | −3.99% | −0.90% | −0.27% |
|    | 2 | 1.0400  | 1.3590  | 2.1010  | 1.3789  | −0.94% | −1.22% | 4.79%  | 4.25%  |
|    | 3 | 1.0738  | 1.4475  | 1.9269  | 1.2700  | 2.28%  | 5.21%  | −3.89% | −3.98% |
| Zn | 1 | 11.7908 | 15.0100 | 18.5309 | 12.8134 | −0.27% | 0.45%  | −0.04% | −1.41% |
|    | 2 | 11.8111 | 14.9500 | 18.5290 | 12.9999 | −0.10% | 0.05%  | −0.05% | 0.02%  |
|    | 3 | 11.8663 | 14.8684 | 18.5555 | 13.1770 | 0.37%  | −0.50% | 0.09%  | 1.39%  |
| Cd | 1 | 0.5041  | 0.5509  | 0.6321  | 0.5499  | −0.12% | 0.61%  | 0.68%  | −1.13% |
|    | 2 | 0.5109  | 0.5409  | 0.6300  | 0.5599  | 1.23%  | −1.22% | 0.34%  | 0.67%  |

|    |   |        |        |        |        |        |        |        |        |
|----|---|--------|--------|--------|--------|--------|--------|--------|--------|
|    | 3 | 0.4991 | 0.5509 | 0.6215 | 0.5588 | -1.11% | 0.61%  | -1.02% | 0.47%  |
|    | 1 | 0.9478 | 0.6890 | 0.5200 | 1.3490 | -0.51% | -0.21% | 0.43%  | 0.91%  |
| Cr | 2 | 0.9555 | 0.7000 | 0.5199 | 1.3089 | 0.30%  | 1.39%  | 0.41%  | -2.09% |
|    | 3 | 0.9546 | 0.6823 | 0.5134 | 1.3528 | 0.20%  | -1.18% | -0.84% | 1.19%  |
|    | 1 | 0.0440 | 0.0899 | 0.0590 | 0.0308 | -4.09% | -1.12% | 1.30%  | -0.47% |
| Ni | 2 | 0.0460 | 0.0902 | 0.0590 | 0.0313 | 0.29%  | -0.77% | 1.37%  | 1.15%  |
|    | 3 | 0.0476 | 0.0926 | 0.0567 | 0.0307 | 3.80%  | 1.89%  | -2.68% | -0.68% |
|    | 1 | 0.2267 | 0.5409 | 0.4487 | 0.1887 | 1.34%  | 0.29%  | -2.30% | 2.78%  |
| As | 2 | 0.2209 | 0.5279 | 0.4509 | 0.1804 | -1.26% | -2.12% | -1.83% | -1.74% |
|    | 3 | 0.2235 | 0.5492 | 0.4783 | 0.1817 | -0.08% | 1.83%  | 4.13%  | -1.04% |

The relative deviation for the measured data is between -4.09% and 4.25%.

A standard curve was plotted before each measurement, and the correlation linearity of the standard curve was greater than 0.999.

| Calibration Summary |       |               |           |       |           |             |         |  |
|---------------------|-------|---------------|-----------|-------|-----------|-------------|---------|--|
| Analyte             | Stds. | Equation      | Intercept | Slope | Curvature | Corr. Coef. | Reslope |  |
| As 188.979          | 5     | Lin, Calc Int | -0.4      | 36.86 | 0.00000   | 0.999858    |         |  |
| Cr 267.716          | 5     | Lin, Calc Int | -16.3     | 601.3 | 0.00000   | 0.999884    |         |  |
| Cd 228.802          | 5     | Lin, Calc Int | -60.0     | 1014  | 0.00000   | 0.999756    |         |  |
| Cu 327.393          | 5     | Lin, Calc Int | -63.5     | 1035  | 0.00000   | 0.999759    |         |  |
| Ni 231.604          | 5     | Lin, Calc Int | -23.6     | 396.7 | 0.00000   | 0.999736    |         |  |
| Pb 220.353          | 5     | Lin, Calc Int | -5.1      | 114.9 | 0.00000   | 0.999790    |         |  |
| Zn 206.200          | 5     | Lin, Calc Int | 1789.7    | 60580 | 0.00000   | 0.999522    |         |  |

Figure S1. Correlation of standard curve.

## 2. Information about QC/QA in the Leaching Program

Leaching was performed using the HJ/T299-2007 method.

The standard sample measurement details are dictated below.

Table S3. Recovery rate of the addition of the standard solution (mg/L).

| Element | Concentration of the sample (C1) | Concentration of the standard solution added (C2) | Concentration after adding the standard solution (C3) | Recovery ratio |
|---------|----------------------------------|---------------------------------------------------|-------------------------------------------------------|----------------|
| Zn      | 0.3124                           | 0.5                                               | 0.7930                                                | 96.12%         |
| Pb      | 3.2823                           | 3                                                 | 6.2130                                                | 97.69%         |
| Cu      | 0.3305                           | 0.5                                               | 0.7952                                                | 92.94%         |
| Cr      | 0.3341                           | 0.5                                               | 0.7699                                                | 87.16%         |
| Ni      | ND                               | 0.5                                               | 0.4857                                                | 97.14%         |
| As      | ND                               | 0.5                                               | 0.4903                                                | 98.06%         |
| Cd      | ND                               | 0.5                                               | 0.5123                                                | 102.46%        |

Two blank samples were created for each batch, and the blank value of the tested elements was not below the detection limit.

Detailed data from the three tests are presented below.

Table S4. Details for HM concentration using the HJ/T299-2007 method (mg/L).

| Element |   | Spring | Summer | Autumn  | Winter | Rd1    | Rd2    | Rd3    | Rd4    |
|---------|---|--------|--------|---------|--------|--------|--------|--------|--------|
| Zn      | 1 | 0.3187 | 1.4789 | 0.8497  | 0.4899 | 1.76%  | -0.11% | -0.48% | -1.33% |
|         | 2 | 0.3067 | 1.4804 | 0.8502  | 0.4859 | -2.08% | -0.01% | -0.42% | -2.13% |
|         | 3 | 0.3142 | 1.4822 | 0.8615  | 0.5137 | 0.32%  | 0.11%  | 0.90%  | 3.46%  |
| Pb      | 1 | 3.3091 | 9.3478 | 10.5923 | 5.9809 | 1.00%  | -0.12% | -0.44% | -0.15% |
|         | 2 | 3.2987 | 9.3509 | 10.6409 | 6.0010 | 0.69%  | -0.08% | 0.02%  | 0.19%  |
|         | 3 | 3.2208 | 9.3774 | 10.6835 | 5.9869 | -1.69% | 0.20%  | 0.42%  | -0.05% |
|         | 1 | 0.3390 | 0.2509 | 0.2103  | 0.2378 | 1.44%  | 3.38%  | 1.20%  | 1.62%  |

|    |   |        |        |        |        |        |        |        |        |
|----|---|--------|--------|--------|--------|--------|--------|--------|--------|
| Cu | 2 | 0.3356 | 0.2440 | 0.1991 | 0.2301 | 0.42%  | 0.54%  | 0.63%  | -1.67% |
|    | 3 | 0.3280 | 0.2332 | 0.2140 | 0.2341 | -1.86% | -3.91% | -1.83% | 0.04%  |
|    | 1 | 0.3079 | 0.0968 | 0.0929 | 0.1622 | 3.39%  | -0.72% | -0.21% | -1.04% |
| Cr | 2 | 0.2934 | 0.0969 | 0.0925 | 0.1635 | -1.48% | -0.62% | -0.64% | -0.24% |
|    | 3 | 0.2921 | 0.0988 | 0.0939 | 0.1660 | -1.91% | 1.33%  | 0.86%  | 1.28%  |

A standard curve was plotted before each measurement, and the correlation linearity of the standard curve was greater than 0.999.

#### Calibration Summary

| Analyte    | Stds. | Equation      | Intercept | Slope | Curvature | Corr. Coef. | Reslope |
|------------|-------|---------------|-----------|-------|-----------|-------------|---------|
| As 188.979 | 5     | Lin, Calc Int | -0.8      | 31.85 | 0.00000   | 0.999529    |         |
| Cr 267.716 | 5     | Lin, Calc Int | -26.9     | 858.2 | 0.00000   | 0.999896    |         |
| Cd 228.802 | 5     | Lin, Calc Int | -51.1     | 1084  | 0.00000   | 0.999858    |         |
| Cu 327.393 | 5     | Lin, Calc Int | -88.8     | 1517  | 0.00000   | 0.999778    |         |
| Ni 231.604 | 5     | Lin, Calc Int | -19.9     | 440.2 | 0.00000   | 0.999823    |         |
| Pb 220.353 | 5     | Lin, Calc Int | 0.2       | 103.5 | 0.00000   | 0.999815    |         |
| Zn 206.200 | 5     | Lin, Calc Int | 1789.7    | 60580 | 0.00000   | 0.999522    |         |

Figure S2. Correlation of standard curve

Table S5. Details of HM concentration using the TCLP method (mg/L).

| Element |   | Spring | Summer | Autumn | Winter | Rd1    | Rd2    | Rd3    | Rd4    |
|---------|---|--------|--------|--------|--------|--------|--------|--------|--------|
| Zn      | 1 | 0.4427 | 1.5326 | 1.0760 | 0.5097 | -0.11% | 0.62%  | -0.19% | -0.14% |
|         | 2 | 0.4396 | 1.5197 | 1.0803 | 0.5100 | -0.81% | -0.22% | 0.21%  | -0.08% |
|         | 3 | 0.4473 | 1.5170 | 1.0777 | 0.5115 | 0.93%  | -0.40% | -0.03% | 0.22%  |
| Pb      | 1 | 3.2278 | 6.3301 | 4.9803 | 2.6983 | 0.00%  | 0.04%  | 0.08%  | -1.05% |
|         | 2 | 3.2198 | 6.3267 | 4.9703 | 2.7145 | -0.25% | -0.01% | -0.12% | -0.45% |
|         | 3 | 3.2358 | 6.3254 | 4.9789 | 2.7679 | 0.25%  | -0.03% | 0.05%  | 1.50%  |
| Cu      | 1 | 0.0856 | 0.1345 | 0.0862 | 0.0693 | -1.27% | -2.18% | -2.16% | -0.29% |
|         | 2 | 0.0862 | 0.1387 | 0.0894 | 0.0683 | -0.58% | 0.87%  | 1.48%  | -1.73% |
|         | 3 | 0.0883 | 0.1393 | 0.0887 | 0.0709 | 1.85%  | 1.31%  | 0.68%  | 2.01%  |
| Cr      | 1 | 0.1667 | 0.0681 | 0.0763 | 0.0937 | -1.59% | -1.59% | -2.05% | -0.43% |
|         | 2 | 0.1698 | 0.0693 | 0.0764 | 0.0950 | 0.24%  | 0.14%  | -1.93% | 0.96%  |
|         | 3 | 0.1717 | 0.0702 | 0.0810 | 0.0936 | 1.36%  | 1.45%  | 3.98%  | -0.53% |

A standard curve was plotted before each measurement, and the correlation linearity of the standard curve was greater than 0.999.

#### Calibration Summary

| Analyte    | Stds. | Equation      | Intercept | Slope  | Curvature | Corr. Coef. | Reslope |
|------------|-------|---------------|-----------|--------|-----------|-------------|---------|
| As 188.979 | 5     | Lin, Calc Int | 4.5       | 3705   | 0.00000   | 0.999910    |         |
| Cr 267.716 | 5     | Lin, Calc Int | 207.2     | 37000  | 0.00000   | 0.999834    |         |
| Cd 228.802 | 5     | Lin, Calc Int | 1134.4    | 139700 | 0.00000   | 0.999976    |         |
| Cu 327.393 | 5     | Lin, Calc Int | -995.7    | 48850  | 0.00000   | 0.999779    |         |
| Ni 231.604 | 5     | Lin, Calc Int | 588.9     | 25910  | 0.00000   | 0.999866    |         |
| Pb 220.353 | 5     | Lin, Calc Int | 187.4     | 7912   | 0.00000   | 0.999909    |         |
| Zn 206.200 | 5     | Lin, Calc Int | 1789.7    | 60580  | 0.00000   | 0.999522    |         |

Figure S3. Correlation of standard curve

### 3. QC/QA about Metal Bioavailability

The standard sample measurement details are shown below.

Table S6. Recovery rate of the addition of the standard solution (mg/L). (ND means below the detection limit).

| Element | Concentration of the sample (C1) | Concentration of the standard solution added | Concentration after adding the standard solution (C3) | Recovery ratio |
|---------|----------------------------------|----------------------------------------------|-------------------------------------------------------|----------------|
|---------|----------------------------------|----------------------------------------------|-------------------------------------------------------|----------------|

| (C2) |        |        |        |         |
|------|--------|--------|--------|---------|
| Pb   | 0.0105 | 0.0100 | 0.0203 | 97.78%  |
| Zn   | 0.0068 | 0.0500 | 0.0566 | 99.55%  |
| Cd   | 0.0029 | 0.0050 | 0.0075 | 92.84%  |
| Cu   | 0.0005 | 0.0005 | 0.0011 | 113.20% |
| Cr   | 0.0002 | 0.0002 | 0.0004 | 100.00% |
| As   | ND     | 0.0500 | 0.0492 | 98.40%  |
| Ni   | ND     | 0.0500 | 0.0521 | 104.20% |

Two blank samples were created for each batch, and the blank value of the tested elements was not below the detection limit.

Detailed data from the three tests are presented below.

Table S7. Test concentration and relative deviation (mg/L).

| Element |   | Spring | Summer | Autumn | Winter | Rd1     | Rd2      | Rd3      | Rd4     |
|---------|---|--------|--------|--------|--------|---------|----------|----------|---------|
| Pb      | 1 | 0.0104 | 0.0074 | 0.0145 | 0.0067 | -1.16%  | -4.74%   | 1.44%    | -2.47%  |
|         | 2 | 0.0103 | 0.0079 | 0.0147 | 0.0065 | -2.11%  | 1.70%    | 2.84%    | -0.44%  |
|         | 3 | 0.0109 | 0.0080 | 0.0137 | 0.0070 | 3.27%   | 3.04%    | -4.28%   | 2.04%   |
| Zn      | 1 | 0.0066 | 0.0038 | 0.0068 | 0.0022 | -3.28%  | -4.62%   | -2.63%   | 2.61%   |
|         | 2 | 0.0067 | 0.0041 | 0.0072 | 0.0021 | -1.82%  | 2.91%    | 3.09%    | -2.05%  |
|         | 3 | 0.0072 | 0.0041 | 0.0070 | 0.0021 | 5.10%   | 1.71%    | -0.46%   | -0.56%  |
| Cd      | 1 | 0.0029 | 0.0019 | 0.0025 | 0.0018 | 1.47%   | -2.66%   | -4.65%   | -5.16%  |
|         | 2 | 0.0028 | 0.0019 | 0.0028 | 0.0019 | -2.03%  | -2.66%   | 6.79%    | 0.11%   |
|         | 3 | 0.0029 | 0.0021 | 0.0026 | 0.0020 | 0.56%   | 5.33%    | -2.14%   | 5.06%   |
| Cu      | 1 | 0.0005 | 0.0012 | 0.0033 | 0.0001 | -6.25%  | 0.00%    | 0.00%    | -50.00% |
|         | 2 | 0.0005 | 0.0013 | 0.0032 | 0.0003 | -6.25%  | 8.33%    | -3.03%   | 50.00%  |
|         | 3 | 0.0006 | 0.0011 | 0.0034 | 0.0002 | 12.50%  | -8.33%   | 3.03%    | 0.00%   |
| Cr      | 1 | 0.0002 | 0.0001 | 0.0001 | 0.0002 | 20.00%  | 50.00%   | 50.00%   | 20.00%  |
|         | 2 | 0.0002 | 0.0001 | 0.000  | 0.0002 | 20.00%  | 50.00%   | -100.00% | 20.00%  |
|         | 3 | 0.0001 | 0.0000 | 0.0001 | 0.0001 | -40.00% | -100.00% | 50.00%   | -40.00% |

The relative deviation of the measured data is between -5.16% and 6.79% (for Pb, Zn, and Cd). The large relative deviations for Cu and Cr are due to their low concentrations, and the concentrations for As and Ni are below the detection limit.

The standard curve was plotted before each measurement, and the correlation linearity of the standard curve was greater than 0.999.

| Calibration Summary |       |               |           |       |           |             |         |
|---------------------|-------|---------------|-----------|-------|-----------|-------------|---------|
| Analyte             | Stds. | Equation      | Intercept | Slope | Curvature | Corr. Coef. | Reslope |
| As 188.979          | 5     | Lin, Calc Int | 1.2       | 32.39 | 0.00000   | 0.999135    |         |
| Cr 267.716          | 5     | Lin, Calc Int | -16.0     | 559.0 | 0.00000   | 0.999863    |         |
| Cd 228.802          | 5     | Lin, Calc Int | -8.1      | 970.8 | 0.00000   | 0.999966    |         |
| Cu 327.393          | 5     | Lin, Calc Int | -10600.1  | 30850 | 0.00000   | 0.988232    |         |
| Ni 231.604          | 5     | Lin, Calc Int | -4438.0   | 13450 | 0.00000   | 0.989254    |         |
| Pb 220.353          | 5     | Lin, Calc Int | 0.9       | 103.5 | 0.00000   | 0.999641    |         |
| Zn 206.200          | 5     | Lin, Calc Int | -9289.6   | 28610 | 0.00000   | 0.989345    |         |

Figure S4. Correlation of standard curve

#### 4. Other Interesting Information

Research pointed out that the main sources of heavy metals in MSW are kitchen waste, ash, plastic, and paper [1, 2]. The composition changes in domestic waste in Beijing are shown in the table below.

Table S8. MSW physical composition of the Haidian and Dongcheng districts (%) [3]

| District  | season | Kitchen<br>waste | Paper | Plastic | Fabric | Wood | Ash  | Metal | Glass | Mixture |
|-----------|--------|------------------|-------|---------|--------|------|------|-------|-------|---------|
| Haidian   | Summer | 68.83            | 10.02 | 13.92   | 1.43   | 0.43 | 1.26 | 0.87  | 0.25  | 3.00    |
|           | Winter | 50.08            | 17.40 | 7.10    | 6.82   | 0.80 | 0.00 | 10.97 | 0.88  | 5.95    |
| Dongcheng | Summer | 60.32            | 18.60 | 10.96   | 2.69   | 0.13 | 0.22 | 2.10  | 4.07  | 4.24    |
|           | Winter | 46.75            | 0.31  | 8.01    | 1.08   | 0.99 | 0.00 | 4.19  | 0.59  | 2.41    |

Table S9. MSW physical composition of the Xicheng and Shijingshan districts (%) [4]

|          | Month     | Kitchen-<br>waste | Dirt | Tile | Paper | Plastic | Textile | Glass | Metal | Mang-<br>osteen | Mixture |
|----------|-----------|-------------------|------|------|-------|---------|---------|-------|-------|-----------------|---------|
| Xi-cheng | January   | 50.75             | 0.00 | 0.74 | 23.52 | 20.52   | 0.74    | 1.12  | 0.00  | 2.62            | 0.00    |
|          | February  | 44.89             | 0.00 | 0.00 | 25.16 | 22.92   | 0.00    | 1.97  | 1.55  | 3.52            | 0.00    |
|          | March     | 57.19             | 0.00 | 0.00 | 17.29 | 21.40   | 0.00    | 0.81  | 0.00  | 3.31            | 0.00    |
|          | April     | 51.19             | 1.29 | 0.00 | 23.76 | 21.00   | 0.00    | 1.11  | 0.00  | 1.66            | 0.00    |
|          | May       | 51.90             | 1.56 | 0.44 | 19.81 | 19.62   | 1.31    | 1.56  | 0.00  | 3.80            | 0.00    |
|          | June      | 50.64             | 0.56 | 2.03 | 17.94 | 18.86   | 0.00    | 1.48  | 1.48  | 7.02            | 0.00    |
|          | July      | 42.96             | 0.00 | 0.00 | 20.93 | 27.28   | 0.00    | 1.39  | 1.39  | 6.05            | 0.00    |
|          | August    | 53.45             | 0.00 | 2.90 | 19.62 | 20.25   | 0.00    | 2.90  | 0.00  | 0.87            | 0.00    |
|          | September | 51.39             | 0.00 | 0.00 | 19.29 | 24.26   | 1.43    | 1.90  | 0.00  | 1.72            | 0.00    |

|             |           |       |      |      |       |       |      |      |      |       |      |
|-------------|-----------|-------|------|------|-------|-------|------|------|------|-------|------|
| Shijingshan | October   | 53.33 | 0.00 | 0.60 | 18.86 | 20.74 | 1.00 | 1.00 | 1.14 | 3.33  | 0.00 |
|             | November  | 47.67 | 0.00 | 0.00 | 19.84 | 28.67 | 0.00 | 0.00 | 0.00 | 3.81  | 0.00 |
|             | December  | 50.83 | 0.00 | 0.00 | 25.54 | 18.43 | 0.00 | 1.91 | 0.00 | 3.28  | 0.00 |
|             | January   | 55.36 | 0.00 | 0.00 | 16.07 | 19.64 | 0.00 | 5.36 | 0.00 | 3.57  | 0.00 |
|             | February  | 52.94 | 0.00 | 2.94 | 19.12 | 16.18 | 4.41 | 2.94 | 0.00 | 1.47  | 0.00 |
|             | March     | 55.93 | 0.00 | 0.00 | 22.03 | 18.64 | 0.00 | 0.00 | 0.00 | 3.39  | 0.00 |
|             | April     | 44.64 | 0.00 | 0.00 | 28.57 | 23.21 | 0.00 | 0.00 | 0.00 | 3.57  | 0.00 |
|             | May       | 45.65 | 2.17 | 0.00 | 26.09 | 19.57 | 0.00 | 2.17 | 0.00 | 4.35  | 0.00 |
|             | June      | 40.00 | 0.00 | 0.00 | 25.71 | 28.57 | 0.00 | 0.00 | 0.00 | 2.86  | 2.86 |
|             | July      | 43.24 | 0.00 | 0.00 | 18.92 | 21.62 | 0.00 | 2.70 | 2.70 | 10.81 | 0.00 |
|             | August    | 50.82 | 0.00 | 0.00 | 19.67 | 24.59 | 0.00 | 4.92 | 0.00 | 0.00  | 0.00 |
|             | September | 49.46 | 0.00 | 0.00 | 13.93 | 25.81 | 2.40 | 4.80 | 0.00 | 3.60  | 0.00 |
|             | October   | 54.17 | 0.00 | 0.00 | 16.67 | 22.22 | 0.00 | 0.00 | 0.00 | 6.94  | 0.00 |
|             | November  | 62.26 | 0.00 | 0.00 | 18.87 | 16.98 | 0.00 | 0.00 | 0.00 | 1.89  | 0.00 |
|             | December  | 54.88 | 0.00 | 0.00 | 26.22 | 17.68 | 0.00 | 0.00 | 0.00 | 1.22  | 0.00 |

1. Long, Y. Y.; Shen, D. S.; Wang, H. T.; Lu, W. J.; Zhao, Y., Heavy metal source analysis in municipal solid waste (MSW): Case study on Cu and Zn. *Journal of Hazardous Materials* **2011**, 186, (2-3), 1082-1087.
2. Erses, A. S.; Fazal, M. A.; Onay, T. T.; Craig, W. H. J. J. o. H. M., Determination of solid waste sorption capacity for selected heavy metals in landfills. **2005**, 121, (1/3), 223-232.
3. Zhang, H. B.; Zhang, H. Y.; Wang, G. Q.; Bai, X. J., Analysis of physical composition and heavy metals pollution of municipal solid waste (MSW) in Beijing. *IOP Conference Series: Earth and Environmental Science* **2018**, 128.
4. wei, C., Comparative analysis of physical composition and characteristics of domestic waste in urban and rural areas of Beijing. *Recycling Research* **2020**, **13**(1).
